# Supplementary material
Source: publisher figshare collection journal article supplement (https://acs.figshare.com/ndownloader/files/31416333)
Supplement: Supplementary file 1 [file 31416333]

**Supporting Information:**

**Potentially poisonous plastic particles: microplastics as vector for  
cyanobacterial toxins microcystin-LR and –LF**

Carlos J. Pestana<sup>a</sup>, Diana S. Moura<sup>a,b</sup>, José Capelo-Neto<sup>b</sup>, Christine Edwards<sup>a</sup>,  
Domenic Dreisbach<sup>c</sup>, Bernhard Spengler<sup>c</sup>, Linda A. Lawton<sup>a</sup>

<sup>a</sup> School of Pharmacy and Life Sciences, Robert Gordon University, Aberdeen, UK

<sup>b</sup> Department of Hydraulic and Environmental Engineering, Federal University of  
Ceará, Fortaleza, Brazil

<sup>c</sup> Institute of Inorganic and Analytical Chemistry, Justus Liebig University,  
Giessen, Germany

The supporting information contains 5 figures, 5 tables, and 2 equations on 14  
pages.

27 **Table of contents:**

|    |                                                                                |    |
|----|--------------------------------------------------------------------------------|----|
| 28 | S1: Plastics selected for this study.....                                      | 3  |
| 29 | S2: Suppliers of chemicals and instruments.....                                | 3  |
| 30 | S2.1: Chemicals and materials.....                                             | 3  |
| 31 | S2.2: Devices and auxiliaries.....                                             | 4  |
| 32 | S3: 3D-surface MALDI imaging of MC-LF bound to PET microplastic                |    |
| 33 | particles.....                                                                 | 6  |
| 34 | S4: Prediction of toxin concentration per particle of                          |    |
| 35 | plastic.....                                                                   | 9  |
| 36 | S5: Evaluation of the electrostatic charge of each type of microplastics under |    |
| 37 | five pH conditions.....                                                        | 10 |
| 38 | S6: Statistical analysis.....                                                  | 11 |
| 39 | S6.1: Significance testing performed using T-test comparing samples with the   |    |
| 40 | control (no plastics).....                                                     | 11 |
| 41 | S6.2: Pearson correlation testing.....                                         | 13 |
| 42 | References.....                                                                | 13 |

43

44

45

46

47

48

49

50

51

52

## S1 Plastics selected for this study

Four plastics that represent typical plastic pollutants were selected for this study: polystyrene (PS), polyvinyl chloride (PVC), polyethylene (PE), and polyethylene terephthalate (PET) (Figure S1). These polymers were selected for their widespread application in food packaging and personal care products. Further, several studies have identified these polymers as the most frequently encountered in both marine and fresh water aquatic systems<sup>1-4</sup>.

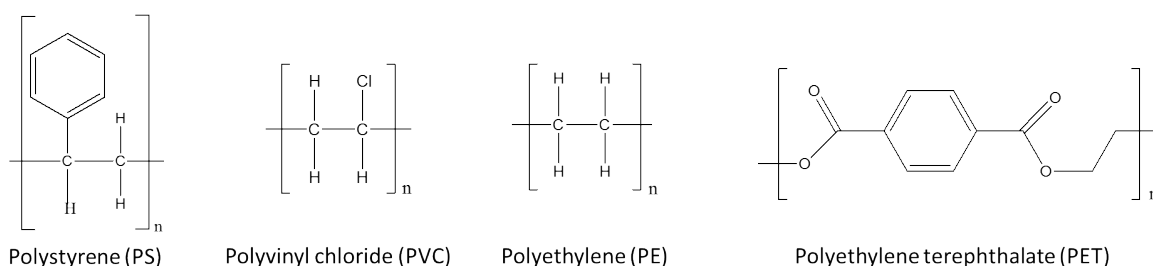

**Figure S1:** Chemical structures of plastic monomers selected as sorbents in this study. Representing four of the most commonly encountered plastic pollutants in the environment.

Additionally, the selected plastics present with a chemically diverse set of monomers including aromatic rings (PS and PET) and halogen moieties (PVC) which can affect adsorption behaviour and sorbent-sorbate interaction<sup>5</sup>.

## S2: Suppliers of chemicals and instruments

### S2.1 Chemicals and materials

All organic solvents (methanol and acetonitrile) were purchased from Fisher Scientific (UK) and were of analytical grade. Trifluoroacetic acid (TFA) used as ion pairing agent in high performance liquid chromatography (HPLC) was

purchased from Fisher Scientific (UK). Microcystin-LR and -LF reference materials were isolated from laboratory cultures with >90% purity. Ultrapure water was produced with an Elga Water Purification System to a resistivity of 18.2 MΩ. Chemical solutions for the adjustment of the pH (nitric acid and sodium hydroxide) were purchased from Sigma Aldrich (UK). The chemicals for the preparation of artificial freshwater ( $\text{CaCl}_2 \cdot 2\text{H}_2\text{O}$ ,  $\text{MgSO}_4 \cdot 2\text{H}_2\text{O}$ ,  $\text{NaHCO}_3$ , and KCl) were purchased from Fischer Scientific (UK). Polystyrene, polyethylene, and polyethylene terephthalate were received as pellets (3-5 mm diameter), while polyvinyl chloride was received as 1 m rods (5 mm diameter). All plastics were purchased from Goodfellow (UK). Fourier Transformer Infrared Spectrophotometry (FT-IR) were used characterised the plastics received to establish the polymer material received (Figure S2). The spectra confirmed the polymer type of the plastics used in the current study.

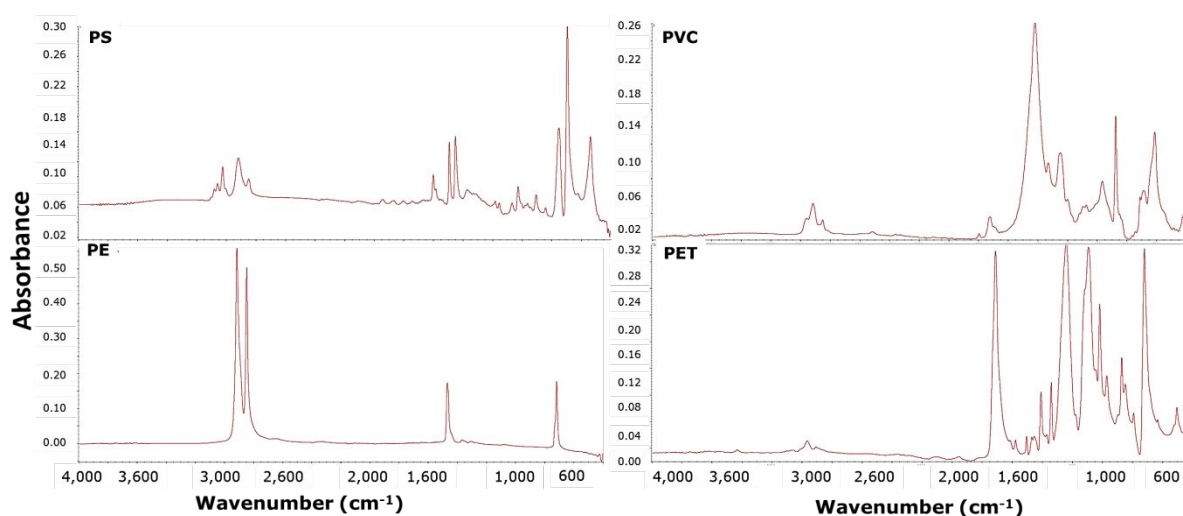

**Figure S2:** FT-IR spectrum of polystyrene (PS), polyvinyl chloride (PVC), polyethylene (PE), and polyethylene terephthalate (PET).

## **S2.2 Devices and auxiliaries**

A Nicolet iS10 FT-IR Spectrometer from Thermo Fisher Scientific with OMNIC Spectra Software was used to analyse the material received from GoodFellow, UK. The FT-IR scanning wavenumber was set from 400 to 4000  $\text{cm}^{-1}$ . The

sample was scanned 32 times, the resolution was set at  $8\text{ cm}^{-1}$ , no correction was applied.

HPLC analysis was performed by using a Waters 2695 Separation Module. High resolution photodiode array detection was performed with a Waters 2996 Photodiode Array Detector (PDA). Separation of analytes was performed with a Symmetry C18 column 2.1 mm (inner diameter) x 150 mm with a  $5\text{ }\mu\text{m}$  particle size (all Waters, UK). The mobile phases used were ultrapure water and acetonitrile, both 0.05% TFA. Chromatography was achieved with a linear gradient from 15 to 75% acetonitrile over 10 minutes, followed by a solvent wash and equilibration. Column temperature was set to  $40^{\circ}\text{C}$  and the flowrate applied was  $0.3\text{ mL min}^{-1}$ . The resolution of the PDA was set to  $1.2\text{ nm}$  and data was acquired over a range of 200 to 400 nm. The limit of quantification achieved by this method was  $0.1\text{ }\mu\text{g mL}^{-1}$ . The measurement of pH was performed with a Five Easy pH probe (Mettler Toledo, USA). Experiments were conducted in an incubation chamber with an orbital shaker (Thermofisher MaxQ 6000, UK) at  $25^{\circ}\text{C}$  with horizontal agitation at 250 rpm. Size reduction of the plastics was achieved in an industrial stainless-steel blender (Waring, USA).

Scanning electron microscopy of the 0.09-0.125 mm plastic samples was performed on an EVO LS10 (Carl Zeiss Ltd, Germany) scanning electron microscope. Samples were mounted on aluminium stubs with double sides carbon adhesive pads and then sputter coated in a gold and palladium mixture.

Scanning electron microscopy was performed under stable pressure, with an acceleration voltage of 25 kV and a working distance of 6.5 to 8 mm.

3D-surface MALDI imaging was performed using an autofocusing AP-SMALDI5 AF high-resolution MALDI imaging ion source (TransMIT GmbH, Germany), operating at atmospheric pressure and coupled to a Q Exactive HF Orbitrap mass

spectrometer (Thermo Fisher Scientific, Germany). The sample was irradiated with 50 UV-laser pulses ( $\lambda = 343$  nm) per pixel at a frequency of 100 Hz. The dedicated autofocus system enabled keeping the laser focus diameter, fluence and ablation spot size constant across the non-flat sample surface by adjusting the sample stage position according to the sample's height profile for each measurement spot. Samples were scanned with 12  $\mu\text{m}$  step size and the target voltage was set to 3 kV. The mass spectrometer was operated in positive-ion mode in a mass-to-charge-number ( $m/z$ ) range of 350 to 1200 at a mass resolution of 240,000 at  $m/z$  200. Internal lock-mass calibration was performed by using a signal of a DHB matrix cluster ( $[\text{5DHB-4H}_2\text{O}+\text{NH}_4]^+$ ,  $m/z$  716.12461), resulting in a mass accuracy of better than 2 ppm for the entire image. The ion injection time was set to 500 ms. The S-lens level was set to 100 arbitrary units, and the capillary temperature was 250  $^\circ\text{C}$ .

A Malvern Zetasizer Nano-ZS ZEN3600 was used to measure the electrostatic charge of PET, PVC, PE, and PS in the experimental medium under five different pHs. A solution containing 20 g L<sup>-1</sup> of each plastic in AFW adjusted to pH 3, pH 5, pH 7, pH 9, and pH 10 was prepared. The pH 2 and pH 11 were not evaluated due the zeta potential cell compatibility (Malvern Zetasizer cell, DTS1070).

Before each analysis, the cell was washed with filtered (0.22  $\mu\text{m}$ ) methanol followed by filtered (0.22  $\mu\text{m}$ ) ultra-pure water (18.2 M $\Omega$ ). Later, the solution with microplastics was placed in the zeta cell carefully evaluating the existence of bubbles. Three measurements were performed of each sample.

### **S3: 3D-surface MALDI imaging of MC-LF bound to polystyrene (PS) microplastic particles**

149 The optical image of the matrix-covered microplastic surface after analysis is  
150 depicted in Figure S3b, demonstrating uniform laser ablation spots throughout  
151 the sample height profile (see Figure S3c). PS microplastic samples showed  
152 height variations up to 155  $\mu\text{m}$  (see Figure S4). To overcome the limitation of  
153 non-flat surfaces in microplastic samples, a MALDI imaging ion source with the  
154 capabilities to maintain uniform laser foci on rough surfaces is essential ("3D-  
155 surface mode").

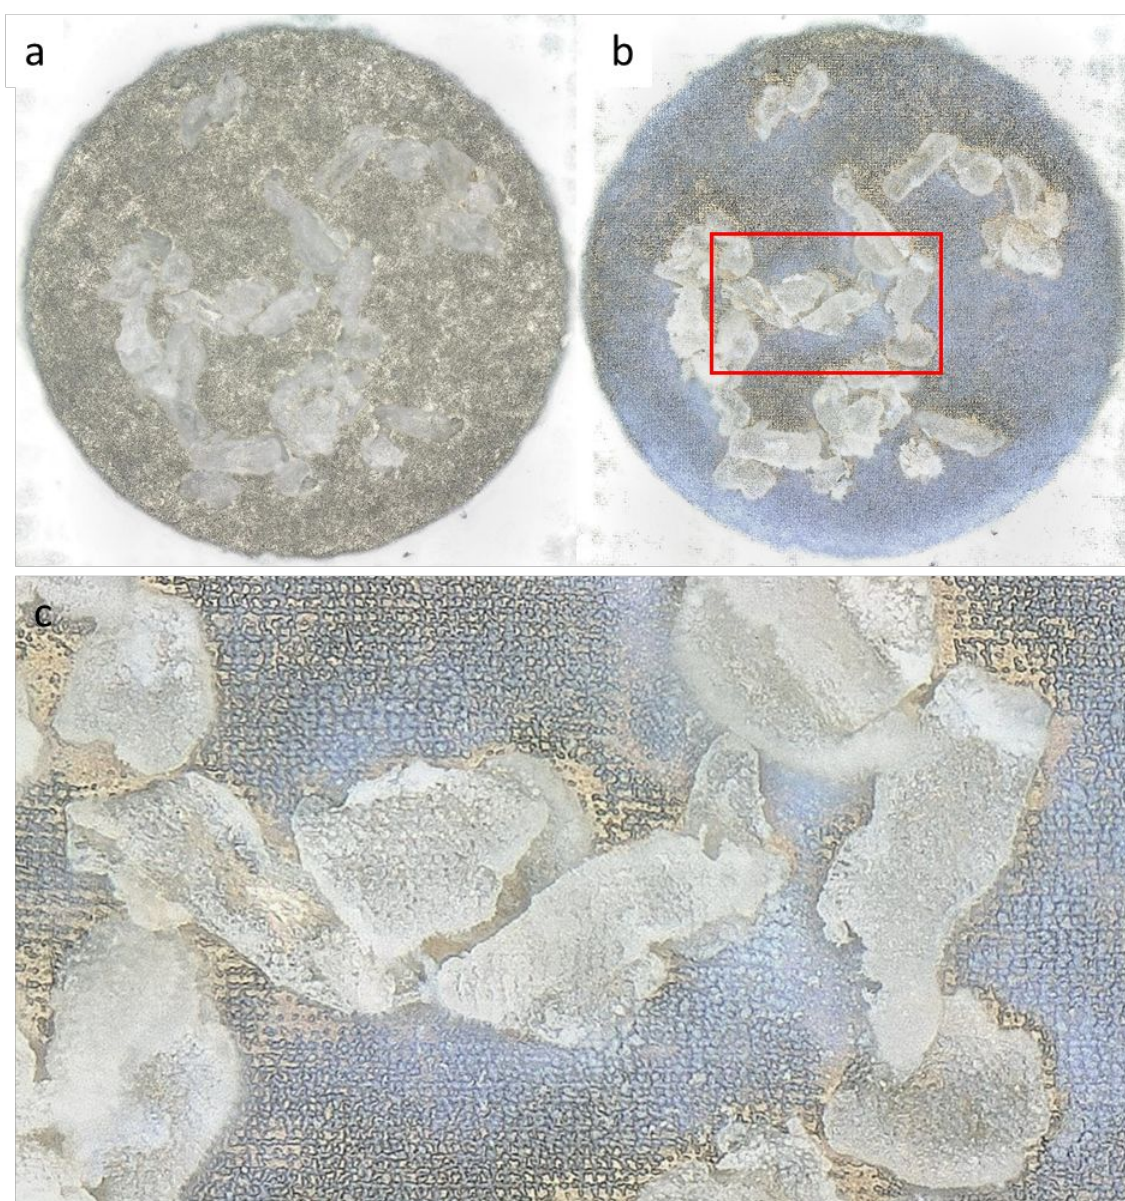



**Figure S3:** (a) Optical image of a PS microplastic sample after matrix application. (b) Optical image of the same PS microplastic sample after MALDI MSI analysis. (c) Magnification of the marked area, showing uniform laser ablation marks throughout the sample height profile.

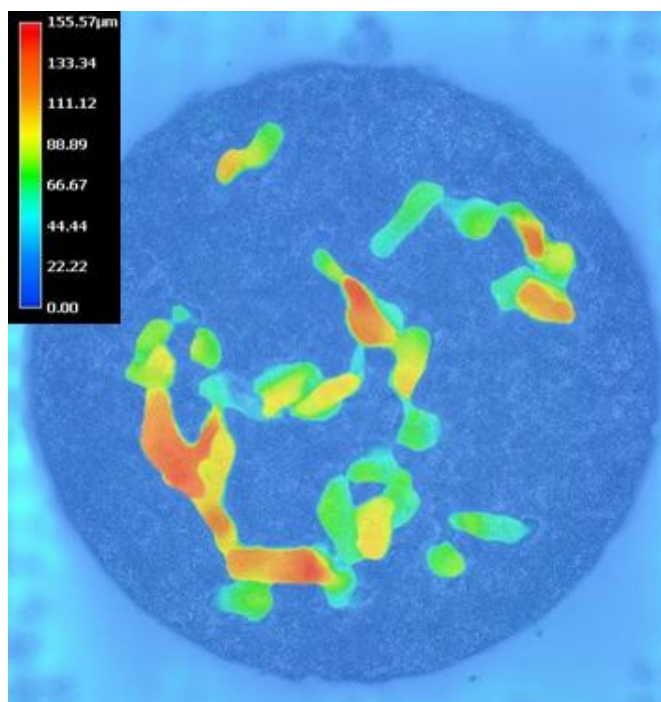

**Figure S4:** Topography image of PS microplastic showing height variations up to 155  $\mu\text{m}$ .

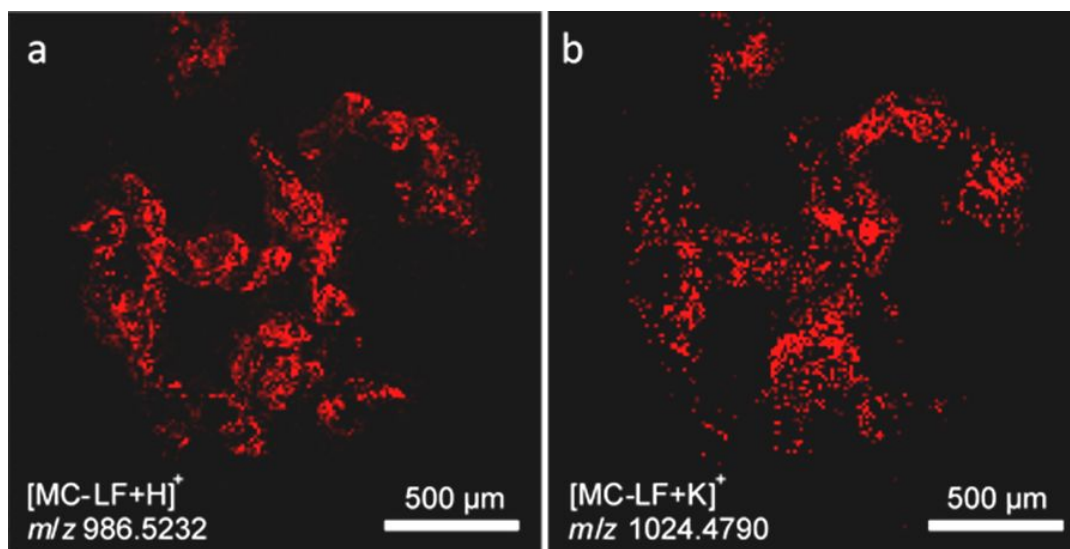

**Figure S5:** 3D-surface MALDI MS images showing the spatial distributions of (a)  $[\text{MC-LF+H}]^+$  at  $m/z$  986.5232 and (b)  $[\text{MC-LF+K}]^+$  at  $m/z$  1024.4790 in red. MS images were generated with 170x174 pixel, 12  $\mu\text{m}$  \* 12  $\mu\text{m}$  pixel size, image bin width:  $\Delta(m/z) = 0.01$ . The scale bars are 500  $\mu\text{m}$ .



#### **S4: Prediction of toxin concentration per particle of plastic**

Having established the concentration of MC-LR and –LF after 48 h of exposure (table S1) allows for the determination of the amount of plastic per particle, allowing for a number of assumptions.

**Table S1:** Concentration of MC-LR and –LF per gram of plastic after 48 hours of exposure. (Experimental conditions: 10 g L<sup>-1</sup> plastic, 5 µg L<sup>-1</sup> MC, horizontal agitation in the dark, pH7, 25 °C).

| <b>Plastic</b> | <b>MC-LR (µg g<sup>-1</sup>)</b> | <b>MC-LF (µg g<sup>-1</sup>)</b> |
|----------------|----------------------------------|----------------------------------|
| <b>PET</b>     | 23.61                            | 142.31                           |
| <b>PVC</b>     | 0                                | 0                                |
| <b>PE</b>      | 13.85                            | 96.69                            |
| <b>PS</b>      | 1.06                             | 91.23                            |

Determination was performed for pH7 results only, as this is the most environmentally relevant pH condition tested and the smallest particle size employed in the study. As the particle preparation of blending with subsequent sieving yields particle size ranges rather than single sizes, the first assumption was an average particle size of 0.1075 mm from the 0.09 to 0.125 mm range. In order to be able to calculate the amount of toxin per particle, the volume of the particle needs to be determined (Equation S1), this can only be done by assuming perfect sphericity of the particles.

Equation S1:

$$V = \frac{4}{3}\pi r^2$$

where:

V = volume of the particle; r = radius of the plastic particle

Then using the densities of the different types of plastic (as stated by the supplier) the weight of each particle can be determined (Equation S2).

Equation S2: 
$$\rho = \frac{m}{V}$$

where:

$\rho$  = density of the plastic;  $m$  = mass of the particle;  $V$  = volume of the particle

Combining the information of the amount of MCs per mass for each of the four plastics tested, the amount of toxin per plastic particle can be determined (Table S2).

**Table S2:** Amount of MC-LR and -LF per plastic particle after 48 hours of exposure. (Experimental conditions: 10 g L<sup>-1</sup> plastic, 5 µg L<sup>-1</sup> MC, horizontal agitation in the dark, pH 7, 25 °C).

| Plastic | MC-LR (pg particle <sup>-1</sup> ) | MC-LF (pg particle <sup>-1</sup> ) |
|---------|------------------------------------|------------------------------------|
| PET     | 0                                  | 0                                  |
| PVC     | 12.4                               | 86.7                               |
| PE      | 0.64                               | 55.1                               |
| PS      | 23.6                               | 127                                |

## S5: Evaluation of the electrostatic charge of each type of microplastics under five pH conditions

**Table S3:** Zeta potential measurement (mV) of polyethylene terephthalate (PET), polyvinyl chloride (PVC), polyethylene (PE), and polystyrene (PS) in artificial freshwater at pH 3, pH 5, pH 7, pH 9, and pH 10.

| Plastic | pH 3   | pH 5  | pH 7   | pH 9   | pH 10 |
|---------|--------|-------|--------|--------|-------|
|         | mV     |       |        |        |       |
| PET     | 0.08   | -0.06 | -0.42  | -2.50  | -5.66 |
| PVC     | 0.06   | -6.20 | -10.96 | -10.89 | -2.96 |
| PE      | -10.88 | -5.62 | -12.63 | -0.19  | 0.17  |
| PS      | -4.17  | -2.90 | -24.37 | -11.88 | 0.03  |

## S6: Statistical analysis

### S6.1: Significance testing performed using T-test comparing samples with the control (no plastics)

The sample data (n=3) were compared with the control data (n=3) to evaluate whether the microcystin adsorption occurred was significant. *P*-values lower than 0.05 (5 percent) were considered as significant different from the control, therefore the occurrence of adsorption was assumed (Table S4).

**Table S4:** *P*-values of t-test significance testing comparing the samples (n=3) with the control (n=3, no plastics). *P*-values > 0.05 (red) adsorption cannot be assumed, *p*-values < 0.05 (green) adsorption can be assumed. SZ-A represents the small size (0.09-0.125 mm), SZ-B represents the medium size (0.25-0.50 mm), SZ-C represents the large size (1-5 mm), and the letter C represents the control.

| PET              | pH 2  |       | pH 5  |       | pH 7  |       | pH 9  |       | pH 11 |       |
|------------------|-------|-------|-------|-------|-------|-------|-------|-------|-------|-------|
|                  | MC-LR | MC-LF |
| SZ-A(2h)xC(2h)   | 0.11  | 0.01  | 0.61  | 0.83  | 0.93  | 0.32  | 0.13  | 0.72  | 0.23  | 0.22  |
| SZ-B(2h)xC(2h)   | 0.20  | 0.23  | 0.74  | 0.87  | 0.08  | 0.39  | 0.10  | 0.11  | 0.28  | 0.61  |
| SZ-C(2h)xC(2h)   | 0.60  | 0.29  | 0.73  | 0.64  | 0.11  | 0.20  | 0.11  | 0.40  | 0.19  | 0.16  |
| SZ-A(6h)xC(6h)   | 0.93  | 0.02  | 0.30  | 0.89  | 0.54  | 0.50  | 0.08  | 0.09  | 0.36  | 0.22  |
| SZ-B(6h)xC(6h)   | 0.95  | 0.55  | 0.30  | 0.24  | 0.29  | 0.79  | 0.08  | 0.92  | 0.30  | 0.85  |
| SZ-C(6h)xC(6h)   | 0.56  | 0.48  | 0.27  | 0.23  | 0.25  | 0.14  | 0.09  | 0.49  | 0.39  | 0.65  |
| SZ-A(12h)xC(12h) | 0.01  | 0.00  | 0.11  | 0.14  | 0.01  | 0.09  | 0.01  | 0.02  | 0.04  | 0.03  |
| SZ-B(12h)xC(12h) | 0.63  | 0.14  | 0.67  | 0.13  | 0.13  | 0.89  | 0.23  | 0.80  | 0.89  | 0.08  |
| SZ-C(12h)xC(12h) | 0.55  | 0.45  | 0.57  | 0.04  | 0.00  | 0.37  | 0.34  | 0.79  | 0.11  | 0.13  |
| SZ-A(24h)xC(24h) | 0.31  | 0.01  | 0.41  | 0.62  | 0.62  | 0.48  | 0.36  | 0.50  | 0.22  | 0.64  |
| SZ-B(24h)xC(24h) | 0.34  | 0.75  | 0.65  | 0.04  | 0.52  | 0.75  | 0.10  | 0.44  | 0.27  | 0.54  |
| SZ-C(24h)xC(12h) | 0.10  | 0.02  | 0.26  | 0.01  | 0.36  | 0.34  | 0.20  | 0.59  | 0.31  | 0.18  |
| SZ-A(48h)xC(48h) | 0.25  | 0.06  | 0.07  | 0.35  | 0.56  | 0.96  | 0.13  | 0.18  | 0.47  | 0.38  |
| SZ-B(48h)xC(48h) | 0.39  | 0.01  | 0.23  | 0.09  | 0.38  | 0.05  | 0.24  | 0.11  | 0.22  | 0.69  |
| SZ-C(48h)xC(48h) | 0.99  | 0.22  | 0.17  | 0.63  | 0.26  | 0.06  | 0.15  | 0.03  | 0.16  | 0.60  |
| PE               | pH 2  |       | pH 5  |       | pH 7  |       | pH 9  |       | pH 11 |       |
|                  | MC-LR | MC-LF |
| SZ-A(2h)xC(2h)   | 0.02  | 0.00  | 0.15  | 0.07  | 0.21  | 0.16  | 0.91  | 0.03  | 0.10  | 0.03  |
| SZ-B(2h)xC(2h)   | 0.10  | 0.01  | 0.03  | 0.70  | 0.46  | 0.85  | 0.35  | 0.15  | 0.25  | 0.22  |
| SZ-C(2h)xC(2h)   | 0.23  | 0.17  | 0.08  | 0.80  | 0.08  | 0.56  | 0.13  | 0.98  | 0.40  | 0.25  |
| SZ-A(6h)xC(6h)   | 0.25  | 0.05  | 0.69  | 0.04  | 0.34  | 0.05  | 0.25  | 0.00  | 0.81  | 0.00  |

|                  |       |       |       |       |       |       |       |       |       |       |
|------------------|-------|-------|-------|-------|-------|-------|-------|-------|-------|-------|
| SZ-B(6h)xC(6h)   | 0.36  | 0.03  | 0.23  | 0.02  | 0.49  | 0.24  | 0.38  | 0.04  | 0.28  | 0.02  |
| SZ-C(6h)xC(6h)   | 0.47  | 0.79  | 0.17  | 0.05  | 0.27  | 0.01  | 0.12  | 0.07  | 0.45  | 0.12  |
| SZ-A(12h)xC(12h) | 0.01  | 0.00  | 0.17  | 0.03  | 0.02  | 0.00  | 0.02  | 0.00  | 0.01  | 0.00  |
| SZ-B(12h)xC(12h) | 0.36  | 0.07  | 0.94  | 0.01  | 0.37  | 0.25  | 0.48  | 0.07  | 0.06  | 0.32  |
| SZ-C(12h)xC(12h) | 0.78  | 0.64  | 0.72  | 0.02  | 0.12  | 0.70  | 0.28  | 0.87  | 0.10  | 0.14  |
| SZ-A(24h)xC(24h) | 0.12  | 0.00  | 0.72  | 0.01  | 0.17  | 0.01  | 0.35  | 0.00  | 0.75  | 0.00  |
| SZ-B(24h)xC(24h) | 0.18  | 0.02  | 0.84  | 0.24  | 0.82  | 0.01  | 0.16  | 0.03  | 0.53  | 0.02  |
| SZ-C(24h)xC(12h) | 0.25  | 0.33  | 0.75  | 0.21  | 0.35  | 0.86  | 0.02  | 0.60  | 0.63  | 0.24  |
| SZ-A(48h)xC(48h) | 0.07  | 0.03  | 0.28  | 0.05  | 0.83  | 0.00  | 0.51  | 0.01  | 0.31  | 0.02  |
| SZ-B(48h)xC(48h) | 0.03  | 0.09  | 0.71  | 0.09  | 0.70  | 0.00  | 0.24  | 0.18  | 0.16  | 0.03  |
| SZ-C(48h)xC(48h) | 0.05  | 0.19  | 0.09  | 0.12  | 0.07  | 0.06  | 0.20  | 0.05  | 0.04  | 0.12  |
| PVC              | pH 2  |       | pH 5  |       | pH 7  |       | pH 9  |       | pH 11 |       |
|                  | MC-LR | MC-LF |
| SZ-A(2h)xC(2h)   | 0.00  | 0.01  | 0.41  | 0.07  | 0.13  | 0.08  | 0.89  | 0.01  | 0.11  | 0.06  |
| SZ-B(2h)xC(2h)   | 0.07  | 0.03  | 0.10  | 0.80  | 0.18  | 0.47  | 0.28  | 0.15  | 0.48  | 0.34  |
| SZ-C(2h)xC(2h)   | 0.05  | 0.16  | 0.02  | 0.49  | 0.10  | 0.34  | 0.10  | 0.02  | 0.37  | 0.52  |
| SZ-A(6h)xC(6h)   | 0.01  | 0.03  | 0.50  | 0.05  | 0.13  | 0.01  | 0.26  | 0.00  | 0.59  | 0.02  |
| SZ-B(6h)xC(6h)   | 0.68  | 0.06  | 0.26  | 0.11  | 0.91  | 0.22  | 0.66  | 0.05  | 0.51  | 0.05  |
| SZ-C(6h)xC(6h)   | 0.22  | 0.68  | 0.28  | 0.08  | 0.68  | 0.69  | 0.11  | 0.02  | 0.34  | 0.65  |
| SZ-A(12h)xC(12h) | 0.03  | 0.01  | 0.24  | 0.04  | 0.01  | 0.00  | 0.01  | 0.01  | 0.00  | 0.00  |
| SZ-B(12h)xC(12h) | 0.41  | 0.07  | 0.91  | 0.01  | 0.79  | 0.24  | 0.45  | 0.08  | 0.21  | 0.01  |
| SZ-C(12h)xC(12h) | 0.54  | 0.20  | 0.84  | 0.03  | 0.82  | 0.05  | 0.79  | 0.10  | 0.19  | 0.07  |
| SZ-A(24h)xC(24h) | 0.28  | 0.00  | 0.79  | 0.01  | 0.09  | 0.06  | 0.02  | 0.01  | 0.52  | 0.00  |
| SZ-B(24h)xC(24h) | 0.08  | 0.00  | 0.65  | 1.00  | 0.71  | 0.04  | 0.15  | 0.11  | 0.52  | 0.01  |
| SZ-C(24h)xC(12h) | 0.12  | 0.05  | 0.64  | 0.11  | 0.54  | 0.50  | 0.26  | 0.10  | 0.41  | 0.26  |
| SZ-A(48h)xC(48h) | 0.37  | 0.00  | 0.40  | 0.03  | 0.17  | 0.00  | 0.04  | 0.00  | 0.83  | 0.01  |
| SZ-B(48h)xC(48h) | 0.15  | 0.04  | 0.39  | 0.49  | 0.87  | 0.17  | 0.36  | 0.11  | 0.11  | 0.17  |
| SZ-C(48h)xC(48h) | 0.50  | 0.17  | 0.27  | 0.00  | 0.37  | 0.78  | 0.43  | 0.02  | 0.07  | 0.14  |
| PS               | pH 2  |       | pH 5  |       | pH 7  |       | pH 9  |       | pH 11 |       |
|                  | MC-LR | MC-LF |
| SZ-A(2h)xC(2h)   | 0.02  | 0.00  | 0.08  | 0.02  | 0.00  | 0.02  | 0.07  | 0.01  | 0.51  | 0.00  |
| SZ-B(2h)xC(2h)   | 0.91  | 0.03  | 0.66  | 0.19  | 0.52  | 0.71  | 0.21  | 0.05  | 0.17  | 0.02  |
| SZ-C(2h)xC(2h)   | 0.96  | 0.37  | 0.29  | 0.90  | 0.10  | 0.48  | 0.12  | 0.30  | 0.14  | 0.32  |
| SZ-A(6h)xC(6h)   | 0.23  | 0.06  | 0.30  | 0.01  | 0.05  | 0.01  | 0.02  | 0.00  | 0.18  | 0.00  |
| SZ-B(6h)xC(6h)   | 0.45  | 0.02  | 0.90  | 0.89  | 0.66  | 0.06  | 0.93  | 0.00  | 0.40  | 0.10  |
| SZ-C(6h)xC(6h)   | 0.47  | 0.12  | 0.50  | 0.02  | 0.23  | 0.54  | 0.15  | 0.09  | 0.59  | 0.11  |
| SZ-A(12h)xC(12h) | 0.05  | 0.00  | 0.47  | 0.02  | 0.01  | 0.00  | 0.01  | 0.00  | 0.01  | 0.00  |
| SZ-B(12h)xC(12h) | 0.47  | 0.04  | 0.77  | 0.02  | 0.50  | 0.13  | 0.76  | 0.02  | 0.21  | 0.10  |
| SZ-C(12h)xC(12h) | 0.53  | 0.41  | 0.37  | 0.08  | 0.16  | 0.84  | 0.28  | 0.08  | 0.19  | 0.04  |
| SZ-A(24h)xC(24h) | 0.05  | 0.00  | 0.04  | 0.00  | 0.02  | 0.00  | 0.03  | 0.00  | 0.17  | 0.00  |
| SZ-B(24h)xC(24h) | 0.21  | 0.00  | 0.44  | 0.55  | 0.84  | 0.35  | 0.25  | 0.03  | 0.28  | 0.07  |
| SZ-C(24h)xC(12h) | 0.38  | 0.64  | 0.32  | 0.52  | 0.42  | 0.11  | 0.29  | 0.45  | 0.35  | 0.78  |
| SZ-A(48h)xC(48h) | 0.09  | 0.00  | 0.05  | 0.01  | 0.01  | 0.00  | 0.01  | 0.00  | 0.98  | 0.02  |
| SZ-B(48h)xC(48h) | 0.19  | 0.02  | 0.50  | 0.26  | 0.50  | 0.02  | 0.96  | 0.08  | 0.08  | 0.09  |
| SZ-C(48h)xC(48h) | 0.22  | 0.27  | 0.88  | 0.08  | 0.37  | 0.38  | 0.82  | 0.34  | 0.34  | 0.41  |

## S6.2: Pearson correlation testing

**Table S5:** Pearson correlation coefficients ( $R^2$ ) evaluating the correlation between the plastic type, MC-LR and -LF adsorption after 48 h contact, average sorption capacity ranking, and glass transition temperature

|                                      | PLASTIC | MC-LR<br>adsorption | MC-LF<br>adsorption | Average<br>sorption<br>capacity<br>ranking | Glass<br>transition<br>temperature |
|--------------------------------------|---------|---------------------|---------------------|--------------------------------------------|------------------------------------|
| PLASTIC                              | 1.00    |                     |                     |                                            |                                    |
| MC-LR adsorption                     | 0.96    | 1.00                |                     |                                            |                                    |
| MC-LF adsorption                     | 0.94    | 0.80                | 1.00                |                                            |                                    |
| Average sorption<br>capacity ranking | -0.68   | -0.47               | -0.89               | 1.00                                       |                                    |
| Glass transition<br>temperature      | 0.37    | 0.60                | 0.02                | 0.43                                       | 1.00                               |

## References

- (1) Eerkes-Medrano, D.; Thompson, R. C.; Aldridge, D. C. Microplastics in Freshwater Systems: A Review of the Emerging Threats, Identification of Knowledge Gaps and Prioritisation of Research Needs. *Water Res.* **2015**, *75*, 63–82. <https://doi.org/10.1016/j.watres.2015.02.012>.
- (2) Li, J.; Liu, H.; Paul Chen, J. Microplastics in Freshwater Systems: A Review on Occurrence, Environmental Effects, and Methods for Microplastics Detection. *Water Res.* **2018**, *137*, 362–374. <https://doi.org/10.1016/j.watres.2017.12.056>.
- (3) Barnes, D. K. A.; Galgani, F.; Thompson, R. C.; Barlaz, M. Accumulation and Fragmentation of Plastic Debris in Global EnvirBarnes, D. K. A., F. Galgani, R. C. Thompson, and M. Barlaz. 2009. "Accumulation and Fragmentation of Plastic Debris in Global Environments." *Philosophical Transactions of the Royal Society B. Philos. Trans. R. Soc. B Biol. Sci.* **2009**, *364* (1526), 1985–1998. <https://doi.org/10.1098/rstb.2008.0205>.

- 262 (4) Fendall, L. S.; Sewell, M. A. Contributing to Marine Pollution by Washing  
263 Your Face : Microplastics in Facial Cleansers . *Marine Pollution Bulletin* , 58,  
264 1225-1228. *Mar. Pollut. Bull.* **2016**, 58 (April), 1225–1228.  
265 <https://doi.org/10.1016/j.marpolbul.2009.04.025>.
- 266 (5) Alimi, O. S.; Farner Budarz, J.; Hernandez, L. M.; Tufenkji, N. Microplastics  
267 and Nanoplastics in Aquatic Environments: Aggregation, Deposition, and  
268 Enhanced Contaminant Transport. *Environ. Sci. Technol.* **2018**, 52 (4),  
269 1704–1724. <https://doi.org/10.1021/acs.est.7b05559>.

270
